# Supplementary material
Source: PubMed Central journal article supplement (PMC5204262)
Supplement: NIHMS838283-supplement-Graphical_abstract.pdf [file NIHMS838283-supplement-Graphical_abstract.pdf]

*Tumor cells*

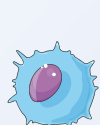

*Immature  
CD8α<sup>+</sup> DC*

**FcIL2 + TA99**

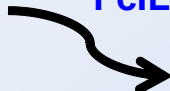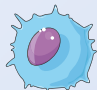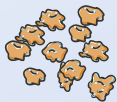

*Tumor cell  
debris*

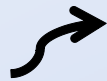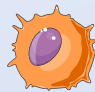

**IFNα**

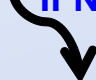

*Mature  
CD8α<sup>+</sup> DC*

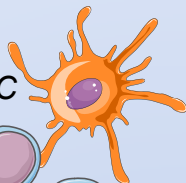

*Naïve CD8<sup>+</sup>  
T cells*

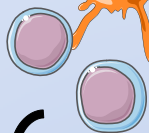

*Primed CD8<sup>+</sup>  
T cells*

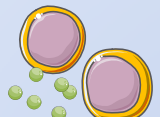

*IFNγ*

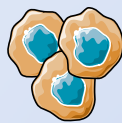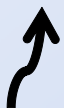

**FcIL2 + TA99  
+ IFNα**

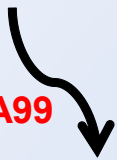

*Mature  
CD8α<sup>+</sup> DC*

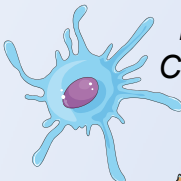

*Tumor cell debris*

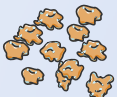

**DC ACTIVATION:  
TOO EARLY**

**DC ACTIVATION:  
PROPER TIME**
